# Supplementary material
Source: MDPI journal article supplement (https://www.mdpi.com/2073-445X/8/11/159)
Supplement: s1 [file s1]

## SUPPLEMENTARY MATERIAL

# Deep tillage improves degraded soils in the (sub) humid Ethiopian highlands

Misbah Abidela Hussein, Habtamu Muche, Petra Schmitter, Prossie Nakawuka, Seifu A. Tilahun, Simon Langan, Jennie Barron, Tammo S. Steenhuis

### TEXT S1: Calculation of discharge and soil loss for the plots

Runoff depth was calculated as follows:

$$d = \frac{V}{A} \quad S1$$

where  $d$  is the runoff depth from the plot.  $V$  is the volume of runoff collected in the barrel and  $A$  is the area of the plot (120 m<sup>2</sup>)

The volume of runoff is collected in two barrels. The second barrel collects runoff when the first barrel with a volume of 127 l is full. The second barrel receives only one tenth of the overflow.

When the first barrel only contains water, the volume of runoff equals

$$V = \frac{\pi D_1^2 h_1}{4} \quad S2$$

where  $h_1$  is the height of the water in the first barrel and  $D_1$  is the diameter of the first barrel.

When the second barrel contains water, the volume of runoff equals

$$V = V_1 + 10 \frac{\pi D_2^2 h_2}{4} \quad S3$$

where  $V_1$  is the total volume if the first barrel  $h_2$  is the height of the water in the second barrel and  $D_2$  is the diameter of the first barrel,

To determine the amount of sediment lost, 1 l samples were taken from each barrel. Water samples were filtered using 100um filter paper. The filter paper and the sediment were oven dried for 24 hours at 105°C. After oven drying, the weight of the sediment was measured and the weight of the and filter paper subtracted. The total sediment load  $L$  per plot can be found as follows

When the first barrel only contains water only contains water, the sediment load per plot is

$$L = VC_1 \quad S4$$

where  $C_1$  is the sediment concentration in the first barrel.

When the second barrel contains water the total sediment load is

$$L = V_1 C_1 + (V - V_1) C_2$$

S5

where  $C_2$  is the sediment concentration in the second barrel.

The sediment load per ha can be simply found by dividing the sediment load of the plot by the plot area in ha

**Table S1.** Soil chemical properties of the top 60 cm before and after the application of the tillage treatments. “Values with different letters at the same depth show a significant difference at  $p < 0.05$  between the tillage treatments and the pre-treatment value.

| Parameter       | Depth (Cm) | Prior to treatment 2015 | CV%   | After 2 years 2016       |                          |                          |
|-----------------|------------|-------------------------|-------|--------------------------|--------------------------|--------------------------|
|                 |            |                         |       | DT                       | CT                       | NT                       |
| pH              | 0-20       | 4.97±0.28 <sup>a</sup>  | 5.7   | 5.63±0.49 <sup>b</sup>   | 5.55±0.60 <sup>b</sup>   | 5.52±0.48 <sup>ab</sup>  |
|                 | 20-40      | 5.30±0.27 <sup>a</sup>  | 5.0   | 5.66±0.46 <sup>a</sup>   | 5.61±0.54 <sup>a</sup>   | 5.59±0.34 <sup>a</sup>   |
|                 | 40-60      | 5.39±0.27 <sup>a</sup>  | 5.1   | 5.73±0.47 <sup>a</sup>   | 5.70±0.45 <sup>a</sup>   | 5.76±0.33 <sup>a</sup>   |
| OM (%)          | 0-20       | 1.21±0.6 <sup>a</sup>   | 50.5  | 1.72±1.04 <sup>a</sup>   | 2.03±0.9 <sup>b</sup>    | 1.80±0.56 <sup>a</sup>   |
|                 | 20-40      | 1.07±0.37 <sup>a</sup>  | 60.1  | 1.79±0.76 <sup>bc</sup>  | 2.76±1.15 <sup>c</sup>   | 1.33±0.75 <sup>ab</sup>  |
|                 | 40-60      | 0.75±0.29 <sup>a</sup>  | 38.7  | 2.29±1.49 <sup>b</sup>   | 1.84±0.92 <sup>b</sup>   | 1.78±0.47 <sup>b</sup>   |
| Sand (%)        | 0-20       | 18.00±14.8 <sup>a</sup> | 82.4  | 20.4±12.09 <sup>a</sup>  | 22±8.59 <sup>a</sup>     | 24.4±11.89 <sup>a</sup>  |
|                 | 20-40      | 17.20±22.0 <sup>a</sup> | 127.8 | 21.60±9.50 <sup>a</sup>  | 20.00±11.73 <sup>a</sup> | 22.00±11.31 <sup>a</sup> |
|                 | 40-60      | 16.00±19.6 <sup>a</sup> | 122.8 | 22.4±12.24 <sup>a</sup>  | 17.20±13.65 <sup>a</sup> | 22.00±13.38 <sup>a</sup> |
| Clay (%)        | 0-20       | 60.40±18.1 <sup>a</sup> | 29.9  | 56.2±16.59 <sup>a</sup>  | 54.0±14.96 <sup>a</sup>  | 56.2±13.92 <sup>a</sup>  |
|                 | 20-40      | 65.20±20.9 <sup>a</sup> | 32.1  | 59.40±8.57 <sup>a</sup>  | 58.60±4.9 <sup>a</sup>   | 60.00±14.03 <sup>a</sup> |
|                 | 40-60      | 67.20±20.9 <sup>a</sup> | 31.1  | 62.2±10.99 <sup>a</sup>  | 63.80±13.04 <sup>a</sup> | 62.60±11.12 <sup>a</sup> |
| Silt (%)        | 0-20       | 21.6±7.9 <sup>a</sup>   | 36.7  | 23.40±10.34 <sup>a</sup> | 22.6±8.93 <sup>a</sup>   | 20.2±7.96 <sup>a</sup>   |
|                 | 20-40      | 17.60±4.1 <sup>a</sup>  | 23.3  | 19.00±5.37 <sup>a</sup>  | 21.00±4.73 <sup>a</sup>  | 18.00±3.58 <sup>a</sup>  |
|                 | 40-60      | 16.8±0.4 <sup>a</sup>   | 13.6  | 15.40±3.44 <sup>a</sup>  | 16.20±4.30 <sup>a</sup>  | 15.40±4.17 <sup>a</sup>  |
| TN (%)          | 0-20       | 0.06±0.04 <sup>a</sup>  | 50    | 0.09±0.05 <sup>a</sup>   | 0.10±0.04 <sup>a</sup>   | 0.09±0.03 <sup>a</sup>   |
|                 | 20-40      | 0.06±0.03 <sup>a</sup>  | 58.7  | 0.09±0.04 <sup>ab</sup>  | 0.14±0.06 <sup>b</sup>   | 0.07±0.04 <sup>a</sup>   |
|                 | 40-60      | 0.04±0.01 <sup>a</sup>  | 34.3  | 0.12±0.07 <sup>b</sup>   | 0.09±0.05 <sup>ab</sup>  | 0.08±0.02 <sup>ab</sup>  |
| CEC cmol (+)/kg | 0-20       | 25.64±12.6 <sup>a</sup> | 49.0  | 25.44±11.76 <sup>a</sup> | 20.96±9.79 <sup>a</sup>  | 25.28±5.09 <sup>a</sup>  |
|                 | 20-40      | 26.24±12.8 <sup>a</sup> | 48.8  | 25.68±7.04 <sup>a</sup>  | 24.12±10.65 <sup>a</sup> | 24.08±4.48 <sup>a</sup>  |
|                 | 40-60      | 20.60±5.7 <sup>a</sup>  | 27.8  | 27.24±15.48 <sup>a</sup> | 23.44±6.07 <sup>a</sup>  | 25.5±11.62 <sup>a</sup>  |
| Av.P (ppm)      | 0-20       | 7.76±10.2 <sup>a</sup>  | 131.2 | 12.88±9.90 <sup>a</sup>  | 7.39±5.18 <sup>a</sup>   | 14.33±12.89 <sup>a</sup> |
|                 | 20-40      | 6.88±4.2 <sup>a</sup>   | 61.2  | 5.63±4.37 <sup>a</sup>   | 5.76±4.38 <sup>a</sup>   | 6.93±6.80 <sup>a</sup>   |
|                 | 40-60      | 6.24±5.56 <sup>a</sup>  | 89.2  | 4.23±3.00 <sup>a</sup>   | 2.62±1.71 <sup>a</sup>   | 4.66±4.63 <sup>a</sup>   |
